# Supplementary material for: Associations of Mutually Exclusive Categories of Physical Activity and Sedentary Behavior with Body Composition and Fall Risk in Older Women: A Cross-Sectional Study
Source: MDPI journal article supplement (doi:10.3390/ijerph20043595), 2023-02-17
Supplement: s1 [file s1]

**Table S1.** Associations with body composition and fall risk assessment: Results from simple linear regression analysis

| Outcome variables                                       | Active-Low Sedentary |              | Active-High Sedentary |              | Inactive-Low Sedentary |              | Inactive-High Sedentary |
|---------------------------------------------------------|----------------------|--------------|-----------------------|--------------|------------------------|--------------|-------------------------|
|                                                         | <i>B (SE)</i>        | <i>p</i>     | <i>B (SE)</i>         | <i>p</i>     | <i>B (SE)</i>          | <i>p</i>     |                         |
| Extracellular-to-intracellular water ratio (%)          | -0.09 (1.2)          | 0.938        | -0.64 (1.3)           | 0.624        | -1. (0.99)             | 0.155        | Reference               |
| Extracellular-to-total body water ratio (%)             | -0.01 (0.5)          | 0.992        | -0.21 (0.6)           | 0.707        | -0.60 (0.4)            | 0.153        | Reference               |
| Lean mass (kg)                                          | 0.14 (2.57)          | 0.956        | 1.96 (2.90)           | 0.500        | 0.34 (2.19)            | 0.878        | Reference               |
| Lean mass index (LMI, kg/m <sup>2</sup> )               | -0.79 (1.07)         | 0.458        | 0.02 (1.21)           | 0.988        | -0.27 (0.91)           | 0.767        | Reference               |
| Fat mass (kg)                                           | <b>-10.58 (3.67)</b> | <b>0.005</b> | -7.36 (4.14)          | 0.079        | <b>-7.15 (3.13)</b>    | <b>0.025</b> | Reference               |
| Fat mass index (FMI, kg/m <sup>2</sup> )                | <b>-4.32 (1.34)</b>  | <b>0.002</b> | -3.14 (1.51)          | <b>0.041</b> | <b>-3.03 (1.14)</b>    | <b>0.009</b> | Reference               |
| Skeletal muscle mass (kg)                               | <b>3.75 (1.61)</b>   | <b>0.022</b> | 0.52 (1.82)           | 0.777        | <b>3.23 (1.37)</b>     | <b>0.021</b> | Reference               |
| Skeletal muscle mass index (SMI, kg/m <sup>2</sup> )    | 0.97 (0.50)          | 0.056        | -0.12 (0.57)          | 0.836        | <b>0.93 (0.43)</b>     | <b>0.033</b> | Reference               |
| Appendicular lean mass (kg)                             | <b>5.47 (1.86)</b>   | <b>0.004</b> | 0.28 (2.10)           | 0.893        | 1.94 (1.59)            | 0.224        | Reference               |
| Appendicular lean mass index (ALMI, kg/m <sup>2</sup> ) | <b>1.65 (0.60)</b>   | <b>0.008</b> | -0.13 (0.68)          | 0.858        | 0.51 (0.52)            | 0.322        | Reference               |

|                                                        |                      |              |                     |              |                     |              |           |
|--------------------------------------------------------|----------------------|--------------|---------------------|--------------|---------------------|--------------|-----------|
| Appendicular fat mass (kg)                             | <b>-12.16 (4.21)</b> | <b>0.005</b> | -9.72 (4.76)        | 0.044        | <b>-9.10 (3.59)</b> | <b>0.013</b> | Reference |
| Appendicular fat mass index (AFMI, kg/m <sup>2</sup> ) | <b>-2.23 (0.70)</b>  | <b>0.002</b> | <b>-1.82 (0.79)</b> | <b>0.024</b> | <b>-1.70 (0.60)</b> | <b>0.006</b> | Reference |
| Perceived fall risk: fear of falling score             | -2.35 (1.19)         | 0.052        | -1.56 (1.38)        | 0.249        | -0.47 (1.02)        | 0.642        | Reference |
| Centre of pressure path length (cm)                    | -7.46 (4.48)         | 0.100        | -7.30 (5.06)        | 0.153        | -5.34 (3.82)        | 0.166        | Reference |
| Sit-to-stand performance (reps)                        | <b>5.62 (1.83)</b>   | <b>0.003</b> | 2.77 (2.07)         | 0.183        | <b>3.34 (1.56)</b>  | <b>0.035</b> | Reference |

---

*Note:*  $B$  = unstandardized regression coefficient, SE = standard error. Bold indicates  $p < 0.05$ .
